# Supplementary material for: Following Ramachandran: exit vector plots (EVP) as a tool to navigate chemical space covered by 3D bifunctional scaffolds. The case of cycloalkanes
Source: Royal Society of Chemistry journal article supplement (doi:10.1039/c5ra19958a), 2016-01-01
Supplement: c5ra19958a3.sdf [file c5ra19958a3.sdf]

ID-001
  Mrv1531612311512083D          

 18 19  0  0  0  0            999 V2000
    0.4594    0.7499    0.7267 C   0  0  1  0  0  0  0  0  0  0  0  0
    0.4578   -0.7560    0.7178 C   0  0  2  0  0  0  0  0  0  0  0  0
    1.8003   -1.1903    0.1365 C   0  0  2  0  0  0  0  0  0  0  0  0
    2.3811    0.0013   -0.5068 N   0  0  2  0  0  0  0  0  0  0  0  0
    1.8030    1.1874    0.1490 C   0  0  2  0  0  0  0  0  0  0  0  0
   -0.4530    0.0037   -0.2123 C   0  0  1  0  0  0  0  0  0  0  0  0
   -1.9280    0.0036    0.0211 C   0  0  2  0  0  0  0  0  0  0  0  0
   -2.2531   -0.0309    1.3352 F   0  0  0  0  0  0  0  0  0  0  0  0
   -2.5277   -1.0636   -0.5613 F   0  0  0  0  0  0  0  0  0  0  0  0
   -2.5201    1.1053   -0.5012 F   0  0  0  0  0  0  0  0  0  0  0  0
    0.0225    1.3032    1.5475 H   0  0  0  0  0  0  0  0  0  0  0  0
    0.0185   -1.3171    1.5320 H   0  0  0  0  0  0  0  0  0  0  0  0
    1.7289   -2.0092   -0.5822 H   0  0  0  0  0  0  0  0  0  0  0  0
    2.4435   -1.5254    0.9566 H   0  0  0  0  0  0  0  0  0  0  0  0
    2.1716    0.0067   -1.4959 H   0  0  0  0  0  0  0  0  0  0  0  0
    2.4474    1.5129    0.9721 H   0  0  0  0  0  0  0  0  0  0  0  0
    1.7331    2.0138   -0.5614 H   0  0  0  0  0  0  0  0  0  0  0  0
   -0.2193    0.0107   -1.2719 H   0  0  0  0  0  0  0  0  0  0  0  0
  1  2  1  0  0  0  0
  1  5  1  0  0  0  0
  1  6  1  0  0  0  0
  1 11  1  0  0  0  0
  2  3  1  0  0  0  0
  2  6  1  0  0  0  0
  2 12  1  0  0  0  0
  3  4  1  0  0  0  0
  3 13  1  0  0  0  0
  3 14  1  0  0  0  0
  4  5  1  0  0  0  0
  4 15  1  0  0  0  0
  5 16  1  0  0  0  0
  5 17  1  0  0  0  0
  6  7  1  0  0  0  0
  6 18  1  0  0  0  0
  7  8  1  0  0  0  0
  7  9  1  0  0  0  0
  7 10  1  0  0  0  0
M  END
>  <Id>
ID-001

>  <V1>
4

>  <V2>
6

>  <X1>
3;5

>  <X2>
7

$$$$
ID-002
  Mrv1531612311512083D          

 41 42  0  0  0  0            999 V2000
   -2.1399    1.7523   15.0313 Br  0  0  0  0  0  0  0  0  0  0  0  0
   -3.7978    1.9408   14.0766 C   0  0  2  0  0  0  0  0  0  0  0  0
   -3.7288    3.1849   13.2704 C   0  0  0  0  0  0  0  0  0  0  0  0
   -4.1659    4.2345   13.6059 O   0  0  0  0  0  0  0  0  0  0  0  0
   -3.0623    2.9643   12.1257 O   0  0  0  0  0  0  0  0  0  0  0  0
   -2.6075    4.1190   11.3417 C   0  0  2  0  0  0  0  0  0  0  0  0
   -2.7186    3.6789    9.8912 C   0  0  2  0  0  0  0  0  0  0  0  0
   -2.1118    4.6599    8.8845 C   0  0  2  0  0  0  0  0  0  0  0  0
   -0.5930    4.7253    8.9410 C   0  0  2  0  0  0  0  0  0  0  0  0
   -0.0526    5.7706    9.8808 C   0  0  2  0  0  0  0  0  0  0  0  0
   -0.7336    5.8337   11.2705 C   0  0  2  0  0  0  0  0  0  0  0  0
   -1.2313    4.4894   11.8302 C   0  0  2  0  0  0  0  0  0  0  0  0
   -0.0047    4.9317    7.6047 N   0  0  0  0  0  0  0  0  0  0  0  0
    0.2266    3.9197    6.7822 C   0  0  0  0  0  0  0  0  0  0  0  0
    0.0136    2.7393    7.0925 O   0  0  0  0  0  0  0  0  0  0  0  0
    0.7498    4.2748    5.4044 C   0  0  0  0  0  0  0  0  0  0  0  0
    0.4987    3.3782    4.3918 C   0  0  0  0  0  0  0  0  0  0  0  0
    0.9418    3.6135    3.1001 C   0  0  0  0  0  0  0  0  0  0  0  0
    1.6456    4.7563    2.8299 C   0  0  0  0  0  0  0  0  0  0  0  0
    1.9129    5.6485    3.8246 C   0  0  0  0  0  0  0  0  0  0  0  0
    1.4648    5.4100    5.1193 C   0  0  0  0  0  0  0  0  0  0  0  0
   -4.4628    2.0916   14.7581 H   0  0  0  0  0  0  0  0  0  0  0  0
   -3.9556    1.1221   13.6000 H   0  0  0  0  0  0  0  0  0  0  0  0
   -3.1685    4.6844   11.5065 H   0  0  0  0  0  0  0  0  0  0  0  0
   -3.7798    3.5569    9.7397 H   0  0  0  0  0  0  0  0  0  0  0  0
   -2.3833    2.9359    9.7694 H   0  0  0  0  0  0  0  0  0  0  0  0
   -2.4805    5.3435    9.0122 H   0  0  0  0  0  0  0  0  0  0  0  0
   -2.3535    4.5265    8.1214 H   0  0  0  0  0  0  0  0  0  0  0  0
   -0.3202    4.0308    9.1458 H   0  0  0  0  0  0  0  0  0  0  0  0
   -0.1550    6.6780    9.4725 H   0  0  0  0  0  0  0  0  0  0  0  0
    0.9151    5.5777    9.9179 H   0  0  0  0  0  0  0  0  0  0  0  0
   -1.3971    6.2695   11.2838 H   0  0  0  0  0  0  0  0  0  0  0  0
   -0.0660    6.2532   11.8183 H   0  0  0  0  0  0  0  0  0  0  0  0
   -0.6206    3.9001   11.5956 H   0  0  0  0  0  0  0  0  0  0  0  0
   -1.2451    4.4992   12.7537 H   0  0  0  0  0  0  0  0  0  0  0  0
    0.1391    5.6540    7.3642 H   0  0  0  0  0  0  0  0  0  0  0  0
    0.1179    2.7235    4.5878 H   0  0  0  0  0  0  0  0  0  0  0  0
    0.7130    3.1320    2.5389 H   0  0  0  0  0  0  0  0  0  0  0  0
    1.8110    4.8969    1.9895 H   0  0  0  0  0  0  0  0  0  0  0  0
    2.3330    6.4710    3.6524 H   0  0  0  0  0  0  0  0  0  0  0  0
    1.6826    5.9318    5.7458 H   0  0  0  0  0  0  0  0  0  0  0  0
  1  2  1  0  0  0  0
  2  3  1  0  0  0  0
  2 22  1  0  0  0  0
  2 23  1  0  0  0  0
  3  4  1  0  0  0  0
  3  5  1  0  0  0  0
  5  6  1  0  0  0  0
  6  7  1  0  0  0  0
  6 12  1  0  0  0  0
  6 24  1  0  0  0  0
  7  8  1  0  0  0  0
  7 25  1  0  0  0  0
  7 26  1  0  0  0  0
  8  9  1  0  0  0  0
  8 27  1  0  0  0  0
  8 28  1  0  0  0  0
  9 10  1  0  0  0  0
  9 13  1  0  0  0  0
  9 29  1  0  0  0  0
 10 11  1  0  0  0  0
 10 30  1  0  0  0  0
 10 31  1  0  0  0  0
 11 12  1  0  0  0  0
 11 32  1  0  0  0  0
 11 33  1  0  0  0  0
 12 34  1  0  0  0  0
 12 35  1  0  0  0  0
 13 14  1  0  0  0  0
 13 36  1  0  0  0  0
 14 15  1  0  0  0  0
 14 16  1  0  0  0  0
 16 17  1  0  0  0  0
 16 21  1  0  0  0  0
 17 18  1  0  0  0  0
 17 37  1  0  0  0  0
 18 19  1  0  0  0  0
 18 38  1  0  0  0  0
 19 20  1  0  0  0  0
 19 39  1  0  0  0  0
 20 21  1  0  0  0  0
 20 40  1  0  0  0  0
 21 41  1  0  0  0  0
M  END
>  <Id>
ID-002

>  <V1>
6

>  <V2>
9

>  <X1>
5

>  <X2>
13

$$$$
ID-003
  Mrv1531612311512083D          

 29 32  0  0  0  0            999 V2000
    2.1833    6.7959    7.7415 C   0  0  0  0  0  0  0  0  0  0  0  0
    3.1061    7.1546    8.7129 C   0  0  0  0  0  0  0  0  0  0  0  0
    4.2366    6.3423    9.0105 C   0  0  0  0  0  0  0  0  0  0  0  0
    4.3876    5.1521    8.3547 C   0  0  0  0  0  0  0  0  0  0  0  0
    3.4701    4.7208    7.3867 C   0  0  0  0  0  0  0  0  0  0  0  0
    3.6412    3.4921    6.7227 C   0  0  0  0  0  0  0  0  0  0  0  0
    2.7918    3.0919    5.7415 C   0  0  0  0  0  0  0  0  0  0  0  0
    1.7093    3.9071    5.3981 C   0  0  0  0  0  0  0  0  0  0  0  0
    1.4946    5.1017    6.0261 C   0  0  0  0  0  0  0  0  0  0  0  0
    2.3614    5.5553    7.0465 C   0  0  0  0  0  0  0  0  0  0  0  0
    1.0109    7.7030    7.4324 C   0  0  1  0  0  0  0  0  0  0  0  0
   -0.0541    7.6808    8.5297 C   0  0  0  0  0  0  0  0  0  0  0  0
    2.6452    9.4223    6.3793 C   0  0  2  0  0  0  0  0  0  0  0  0
    2.8337   10.9668    6.2681 C   0  0  0  0  0  0  0  0  0  0  0  0
    2.9053   11.2588    4.7653 C   0  0  1  0  0  0  0  0  0  0  0  0
    2.0035   10.1501    4.1749 C   0  0  0  0  0  0  0  0  0  0  0  0
    2.4243    8.9080    4.9484 C   0  0  0  0  0  0  0  0  0  0  0  0
    2.5116   12.6506    4.3254 C   0  0  0  0  0  0  0  0  0  0  0  0
    3.3750   13.3383    3.4766 C   0  0  0  0  0  0  0  0  0  0  0  0
    3.0031   14.5641    2.9272 C   0  0  0  0  0  0  0  0  0  0  0  0
    1.7949   15.1140    3.2624 C   0  0  0  0  0  0  0  0  0  0  0  0
    0.9585   14.4529    4.1373 C   0  0  0  0  0  0  0  0  0  0  0  0
    1.3095   13.2301    4.6590 C   0  0  0  0  0  0  0  0  0  0  0  0
    2.2942   17.1728    2.1210 C   0  0  0  0  0  0  0  0  0  0  0  0
    1.6465   18.4741    1.6517 C   0  0  0  0  0  0  0  0  0  0  0  0
    1.4570    9.1481    7.2771 N   0  0  0  0  0  0  0  0  0  0  0  0
    1.3243   16.3235    2.7571 O   0  0  0  0  0  0  0  0  0  0  0  0
    0.4164   18.4816    1.4620 O   0  0  0  0  0  0  0  0  0  0  0  0
    2.4802   19.4005    1.5028 O   0  0  0  0  0  0  0  0  0  0  0  0
  1  2  1  0  0  0  0
  1 10  1  0  0  0  0
  1 11  1  0  0  0  0
  2  3  1  0  0  0  0
  3  4  1  0  0  0  0
  4  5  1  0  0  0  0
  5  6  1  0  0  0  0
  5 10  1  0  0  0  0
  6  7  1  0  0  0  0
  7  8  1  0  0  0  0
  8  9  1  0  0  0  0
  9 10  1  0  0  0  0
 11 12  1  0  0  0  0
 11 26  1  0  0  0  0
 13 14  1  0  0  0  0
 13 17  1  0  0  0  0
 13 26  1  0  0  0  0
 14 15  1  0  0  0  0
 15 16  1  0  0  0  0
 15 18  1  0  0  0  0
 16 17  1  0  0  0  0
 18 19  1  0  0  0  0
 18 23  1  0  0  0  0
 19 20  1  0  0  0  0
 20 21  1  0  0  0  0
 21 22  1  0  0  0  0
 21 27  1  0  0  0  0
 22 23  1  0  0  0  0
 24 25  1  0  0  0  0
 24 27  1  0  0  0  0
 25 28  1  0  0  0  0
 25 29  1  0  0  0  0
M  END
>  <Id>
ID-003

>  <V1>
13

>  <V2>
15

>  <X1>
26

>  <X2>
18

$$$$

  Mrv1531612311512083D          

 13 14  0  0  0  0            999 V2000
   -1.5376   -1.2878   -0.0656 C   0  0  0  0  0  0  0  0  0  0  0  0
   -0.9098   -0.5231    0.9099 C   0  0  0  0  0  0  0  0  0  0  0  0
   -1.7521   -0.3989    2.0203 C   0  0  0  0  0  0  0  0  0  0  0  0
   -3.0498   -1.0785    1.7824 C   0  0  2  0  0  0  0  0  0  0  0  0
   -2.8691   -1.7187    0.3686 C   0  0  0  0  0  0  0  0  0  0  0  0
    0.3709    0.0682    0.8881 C   0  0  0  0  0  0  0  0  0  0  0  0
   -1.3042    0.3008    3.1684 C   0  0  0  0  0  0  0  0  0  0  0  0
   -1.0438   -1.5873   -1.1773 O   0  0  0  0  0  0  0  0  0  0  0  0
    0.7947    0.8067    2.0099 C   0  0  0  0  0  0  0  0  0  0  0  0
   -0.0371    0.9227    3.1414 C   0  0  0  0  0  0  0  0  0  0  0  0
   -2.3097    0.4172    4.7333 Br  0  0  0  0  0  0  0  0  0  0  0  0
    1.1945   -0.0611   -0.1795 O   0  0  0  0  0  0  0  0  0  0  0  0
   -4.2666   -0.1130    1.8325 C   0  0  0  0  0  0  0  0  0  0  0  0
  2  1  1  0  0  0  0
  3  2  1  0  0  0  0
  4  5  1  0  0  0  0
  5  1  1  0  0  0  0
  6  2  2  0  0  0  0
  7  3  2  0  0  0  0
  8  1  2  0  0  0  0
  9  6  1  0  0  0  0
 10  9  2  0  0  0  0
 11  7  1  0  0  0  0
 12  6  1  0  0  0  0
 13  4  1  0  0  0  0
  3  4  1  0  0  0  0
 10  7  1  0  0  0  0
M  END
>  <Id>
ID-004

>  <V1>
4

>  <V2>
6

>  <X1>
13

>  <X2>
12

$$$$

  Mrv1531612311512083D          

 12 13  0  0  0  0            999 V2000
    2.5757    4.1088   -0.0739 C   0  0  0  0  0  0  0  0  0  0  0  0
    2.1092    5.2928    0.4412 N   0  0  0  0  0  0  0  0  0  0  0  0
    3.8117    3.9181    0.4454 N   0  0  0  0  0  0  0  0  0  0  0  0
    2.0440    3.1873   -0.9844 N   0  0  0  0  0  0  0  0  0  0  0  0
    4.1330    4.9256    1.2534 C   0  0  0  0  0  0  0  0  0  0  0  0
    3.0585    5.7875    1.2628 C   0  0  0  0  0  0  0  0  0  0  0  0
    0.8433    0.7713   -2.0245 N   0  0  0  0  0  0  0  0  0  0  0  0
    0.8768    5.9977    0.2168 C   0  0  0  0  0  0  0  0  0  0  0  0
    2.8762    2.1162   -1.5289 C   0  0  0  0  0  0  0  0  0  0  0  0
    0.6905    3.2174   -1.5122 C   0  0  0  0  0  0  0  0  0  0  0  0
    0.0026    1.8288   -1.4241 C   0  0  0  0  0  0  0  0  0  0  0  0
    2.1917    0.7312   -1.4240 C   0  0  0  0  0  0  0  0  0  0  0  0
  2  1  1  0  0  0  0
  3  1  2  0  0  0  0
  4  1  1  0  0  0  0
  5  3  1  0  0  0  0
  6  2  1  0  0  0  0
  7 11  1  0  0  0  0
  8  2  1  0  0  0  0
  9  4  1  0  0  0  0
 10  4  1  0  0  0  0
 11 10  1  0  0  0  0
 12  9  1  0  0  0  0
  6  5  2  0  0  0  0
 12  7  1  0  0  0  0
M  END
>  <Id>
ID-005

>  <V1>
4

>  <V2>
7

>  <X1>
9;10

>  <X2>
11;12

$$$$

  Mrv1531612311512083D          

 11 11  0  0  0  0            999 V2000
    0.2344   -0.3475    0.6259 N   0  0  2  0  0  0  0  0  0  0  0  0
   -1.6255   -0.9374    2.8821 N   0  0  1  0  0  0  0  0  0  0  0  0
   -1.1474   -2.4439    0.8635 C   0  0  2  0  0  0  0  0  0  0  0  0
   -0.6315   -1.3391   -0.0939 C   0  0  0  0  0  0  0  0  0  0  0  0
   -2.1987   -1.8841    1.8647 C   0  0  0  0  0  0  0  0  0  0  0  0
   -0.0562   -3.1386    1.6052 N   0  0  0  0  0  0  0  0  0  0  0  0
   -0.5399    0.7973    1.2047 C   0  0  0  0  0  0  0  0  0  0  0  0
   -1.4786    0.4837    2.4128 C   0  0  0  0  0  0  0  0  0  0  0  0
   -2.3861   -0.9855    4.1760 C   0  0  0  0  0  0  0  0  0  0  0  0
    1.3933    0.1189   -0.1988 C   0  0  0  0  0  0  0  0  0  0  0  0
    0.9359   -3.8794    0.7924 C   0  0  0  0  0  0  0  0  0  0  0  0
  2  8  1  0  0  0  0
  3  4  1  0  0  0  0
  4  1  1  0  0  0  0
  5  3  1  0  0  0  0
  6  3  1  0  0  0  0
  7  1  1  0  0  0  0
  8  7  1  0  0  0  0
  9  2  1  0  0  0  0
 10  1  1  0  0  0  0
 11  6  1  0  0  0  0
  2  5  1  0  0  0  0
M  END
>  <Id>
ID-006

>  <V1>
1

>  <V2>
3

>  <X1>
4;7

>  <X2>
6

$$$$

  Mrv1531612311512083D          

 13 14  0  0  0  0            999 V2000
    1.7369   -0.0650   -2.4343 N   0  0  1  0  0  0  0  0  0  0  0  0
    2.1660    1.3605   -2.5297 C   0  0  0  0  0  0  0  0  0  0  0  0
    2.1321   -0.7081   -3.7164 C   0  0  0  0  0  0  0  0  0  0  0  0
    2.5640    1.6663   -3.9891 C   0  0  1  0  0  0  0  0  0  0  0  0
    2.9388    0.3058   -4.5584 C   0  0  2  0  0  0  0  0  0  0  0  0
    1.4756    1.3718   -6.1621 N   0  0  0  0  0  0  0  0  0  0  0  0
    2.0172   -0.7867   -1.1308 C   0  0  2  0  0  0  0  0  0  0  0  0
    2.5625    0.3881   -6.0496 C   0  0  0  0  0  0  0  0  0  0  0  0
    1.4522    2.1837   -4.9334 C   0  0  0  0  0  0  0  0  0  0  0  0
    1.5577   -2.2940   -1.1188 C   0  0  0  0  0  0  0  0  0  0  0  0
    1.4338    0.0051    0.0953 C   0  0  0  0  0  0  0  0  0  0  0  0
    2.0259   -3.1213    0.1047 C   0  0  0  0  0  0  0  0  0  0  0  0
   -0.1096    0.1147    0.1579 C   0  0  0  0  0  0  0  0  0  0  0  0
  2  1  1  0  0  0  0
  3  1  1  0  0  0  0
  4  2  1  0  0  0  0
  5  3  1  0  0  0  0
  6  8  1  0  0  0  0
  7  1  1  0  0  0  0
  8  5  1  0  0  0  0
  9  4  1  0  0  0  0
 10  7  1  0  0  0  0
 11  7  1  0  0  0  0
 12 10  1  0  0  0  0
 13 11  1  0  0  0  0
  5  4  1  0  0  0  0
  9  6  1  0  0  0  0
M  END
>  <Id>
ID-007

>  <V1>
1

>  <V2>
6

>  <X1>
2;3

>  <X2>
8;9

$$$$

  Mrv1531612311512083D          

 13 14  0  0  0  0            999 V2000
    2.4516   -0.3114   -0.0104 N   0  0  0  0  0  0  0  0  0  0  0  0
    3.4929   -0.1192    0.8345 C   0  0  0  0  0  0  0  0  0  0  0  0
    3.0547   -0.0349    2.1044 N   0  0  0  0  0  0  0  0  0  0  0  0
    4.8213   -0.0332    0.3604 C   0  0  0  0  0  0  0  0  0  0  0  0
    1.3264   -0.3656    0.7293 C   0  0  0  0  0  0  0  0  0  0  0  0
    2.6106   -0.4196   -1.3595 C   0  0  0  0  0  0  0  0  0  0  0  0
    1.7222   -0.1846    2.0542 C   0  0  0  0  0  0  0  0  0  0  0  0
    5.0049   -0.1431   -1.0402 C   0  0  0  0  0  0  0  0  0  0  0  0
    3.9056   -0.3395   -1.9016 C   0  0  0  0  0  0  0  0  0  0  0  0
    4.1497   -0.4987   -3.7384 Br  0  0  0  0  0  0  0  0  0  0  0  0
   -0.0598   -0.5477    0.2564 C   0  0  0  0  0  0  0  0  0  0  0  0
    5.9683    0.1786    1.2726 C   0  0  0  0  0  0  0  0  0  0  0  0
   -0.6017    0.7302   -0.0451 O   0  0  0  0  0  0  0  0  0  0  0  0
  2  1  1  0  0  0  0
  3  2  2  0  0  0  0
  4  2  1  0  0  0  0
  5  1  1  0  0  0  0
  6  1  1  0  0  0  0
  7  5  2  0  0  0  0
  8  9  1  0  0  0  0
  9  6  2  0  0  0  0
 10  9  1  0  0  0  0
 11  5  1  0  0  0  0
 12  4  1  0  0  0  0
 13 11  1  0  0  0  0
  7  3  1  0  0  0  0
  4  8  2  0  0  0  0
M  END
>  <Id>
ID-008

>  <V1>
5

>  <V2>
9

>  <X1>
11

>  <X2>
10

$$$$

  Mrv1531612311512083D          

  9 10  0  0  0  0            999 V2000
   -2.3833   -2.4388   -0.1821 C   0  0  1  0  0  0  0  0  0  0  0  0
   -3.6329   -2.8218    0.6423 C   0  0  0  0  0  0  0  0  0  0  0  0
   -3.2605   -1.7009   -1.2186 C   0  0  0  0  0  0  0  0  0  0  0  0
   -1.2241   -1.6848    0.5072 C   0  0  0  0  0  0  0  0  0  0  0  0
   -1.4161   -3.5471   -0.6558 C   0  0  0  0  0  0  0  0  0  0  0  0
   -4.5088   -2.0855   -0.3949 C   0  0  2  0  0  0  0  0  0  0  0  0
   -0.2580   -2.7918    0.0320 C   0  0  2  0  0  0  0  0  0  0  0  0
    0.3713   -3.5463    1.1228 N   0  0  0  0  0  0  0  0  0  0  0  0
   -5.2355   -0.9307    0.1469 N   0  0  0  0  0  0  0  0  0  0  0  0
  2  1  1  0  0  0  0
  3  1  1  0  0  0  0
  4  1  1  0  0  0  0
  5  1  1  0  0  0  0
  6  3  1  0  0  0  0
  7  5  1  0  0  0  0
  8  7  1  0  0  0  0
  9  6  1  0  0  0  0
  7  4  1  0  0  0  0
  2  6  1  0  0  0  0
M  END
>  <Id>
ID-009

>  <V1>
6

>  <V2>
7

>  <X1>
9

>  <X2>
8

$$$$
